# Supplementary material
Source: PubMed Central journal article supplement (PMC8380825)
Supplement: NIHMS1696929-supplement-SI_file_1-additional-tables-and-figures.pdf [file NIHMS1696929-supplement-SI_file_1-additional-tables-and-figures.pdf]

**Structural perspective on ancient neuropeptide Y -like system reveals hallmark  
features for peptide recognition and receptor activation**

**AUTHORS**

Miron Mikhailowitsch Gershkovich<sup>a,c,1</sup>, Victoria Elisabeth Groß<sup>b,2</sup>, Oanh Vu<sup>c</sup>, Clara Tabea  
Schoeder<sup>c,d</sup>, Jens Meiler<sup>c,d</sup>, Simone Prömel<sup>b,2</sup>, Anette Kaiser<sup>a\*</sup>

**SUPPLEMENTARY INFORMATION**

**Table S1. Activity of NPR-1 mutants in cAMP reporter gene assays ( $G_{i/o}$ ).  $EC_{50}$  shifts are given relative to the wild type receptor. All variants tested were full agonists with  $E_{max}$  values within the statistical error of the wild type receptor-peptide pairing. Data represent mean  $\pm$  SEM of  $n \geq 3$  independent experiments. n.d., activation not determinable up to 10  $\mu$ M peptide concentration.**

|               |                                  | peptide                    |              |
|---------------|----------------------------------|----------------------------|--------------|
|               |                                  | FLP-21                     |              |
|               |                                  | $EC_{50}$ [nM]             | x-fold of wt |
|               |                                  | $\log EC_{50} \pm$ SEM     |              |
| receptor      | <b>NPR-1 wt</b>                  | 0.8<br>(-9.10 $\pm$ 0.05)  | (1)          |
|               | <b>Nluc-NPR-1</b>                | 0.2<br>(-9.79 $\pm$ 0.12)  | 0.3          |
|               | <b>T2.61A</b>                    | 139<br>(-6.86 $\pm$ 0.11)  | 176          |
|               | <b>T2.61S</b>                    | 26<br>(-7.59 $\pm$ 0.13)   | 33           |
|               | <b>Q3.32H</b>                    | 37<br>(-7.43 $\pm$ 0.11)   | 49           |
|               | <b>Y4.60A</b>                    | 5<br>(-8.30 $\pm$ 0.11)    | 6.3          |
|               | <b>F5.24L</b>                    | 25<br>(-7.61 $\pm$ 0.61)   | 32           |
|               | <b>E5.27A</b>                    | n.d.                       | n.d.         |
|               | <b>E5.27Q</b>                    | n.d.                       | n.d.         |
|               | <b>E5.27D</b>                    | 495<br>(-6.31 $\pm$ 0.10)  | 627          |
|               | <b>T5.39A</b>                    | 2.7<br>(-8.57 $\pm$ 0.13)  | 3.4          |
|               | <b>W6.48Y</b>                    | 2.94<br>(-8.53 $\pm$ 0.19) | 3.7          |
|               | <b>W6.48H</b>                    | 10<br>(-8.00 $\pm$ 0.12)   | 13           |
|               | <b>I6.58A</b>                    | 3.6<br>(-8.45 $\pm$ 0.18)  | 4.6          |
|               | <b>E6.59A</b>                    | 20<br>(-7.70 $\pm$ 0.11)   | 25           |
|               | <b>E6.59D</b>                    | 0.1<br>(-9.88 $\pm$ 0.15)  | 0.13         |
|               | <b>D6.61A</b>                    | 8.3<br>(-8.10 $\pm$ 0.08)  | 10           |
|               | <b>D6.62A</b>                    | 2.8<br>(-8.55 $\pm$ 0.18)  | 3.5          |
|               | <b>E6.59A+D6.61A</b>             | 1469<br>(-5.83 $\pm$ 0.29) | 1859         |
|               | <b>E6.59A+D6.61A<br/>+D6.62A</b> | n.d.                       | n.d.         |
|               | <b>D7.26A</b>                    | 1.2<br>(-8.92 $\pm$ 0.16)  | 1.5          |
|               | <b>D7.27A</b>                    | 3.6<br>(-8.45 $\pm$ 0.26)  | 4.5          |
| <b>Y7.28A</b> | 1.8<br>(-8.74 $\pm$ 0.11)        | 2.3                        |              |
| <b>Y7.32A</b> | 19<br>(-7.72 $\pm$ 0.09)         | 24                         |              |

**Table S2. Activity of FLP-21 mutants in cAMP reporter gene assays ( $G_{i/o}$ ).  $EC_{50}$  shifts are given relative to the corresponding wild type receptor. All variants tested were full agonists with  $E_{max}$  values within the statistical error of the wild type receptor-peptide pairing. n.d., activation not determinable up to 10  $\mu$ M peptide concentration. Data represent mean  $\pm$  SEM of  $n \geq 3$  independent experiments.**

|         |                     | receptor                                 |                 |                                          |                 |
|---------|---------------------|------------------------------------------|-----------------|------------------------------------------|-----------------|
|         |                     | NPR-1                                    |                 | NPR-11                                   |                 |
|         |                     | $EC_{50}$ [nM]<br>$\log EC_{50} \pm SEM$ | x-fold<br>of wt | $EC_{50}$ [nM]<br>$\log EC_{50} \pm SEM$ | x-fold<br>of wt |
| peptide | FLP-21              | 0.8<br>(-9.10 $\pm$ 0.05)                | (1)             | 51<br>(-7.30 $\pm$ 0.05)                 | (1)             |
|         | Ac-FLP-21           | 2.6<br>(-8.58 $\pm$ 0.18)                | 3.3             | 120<br>(-6.92 $\pm$ 0.12)                | 2.4             |
|         | [TAMRA]-FLP-21      | 9.4<br>(-8.03 $\pm$ 0.16)                | 12              | 212<br>(-6.67 $\pm$ 0.10)                | 4.2             |
|         | [R5A]-FLP-21        | 290<br>(-6.54 $\pm$ 0.15)                | 367             | 925<br>(-6.03 $\pm$ 0.17)                | 18              |
|         | [R5hArg]-FLP-21     | 5.2<br>(-8.28 $\pm$ 0.13)                | 6.6             | 295<br>(-6.53 $\pm$ 0.10)                | 5.8             |
|         | [P6A]-FLP-21        | 27<br>(-7.57 $\pm$ 0.35)                 | 34              | 925<br>(-6.03 $\pm$ 0.18)                | 18              |
|         | [P6G]-FLP-21        | 464<br>(-6.33 $\pm$ 0.18)                | 587             | n.d.                                     | n.d.            |
|         | [L7A]-FLP-21        | 393<br>(-6.41 $\pm$ 0.15)                | 497             | 478<br>(-6.32 $\pm$ 0.19)                | 9.4             |
|         | [R8A]-FLP-21        | n.d.                                     | n.d.            | n.d.                                     | n.d.            |
|         | [R8Q]-FLP-21        | n.d.                                     | n.d.            | n.d.                                     | n.d.            |
|         | [R8hArg]-FLP-21     | 771<br>(-6.11 $\pm$ 0.17)                | 976             | 6868<br>(-5.16 $\pm$ 0.50)               | 135             |
|         | [F9A]-FLP-21        | n.d.                                     | n.d.            | n.d.                                     | n.d.            |
|         | [F9L]-FLP-21        | n.d.                                     | n.d.            | n.d.                                     | n.d.            |
|         | [F9Cha]-FLP-21      | 478<br>(-6.32 $\pm$ 0.20)                | 605             | 1078<br>(-5.97 $\pm$ 0.13)               | 21              |
|         | [F9Y]-FLP-21        | 11<br>(-7.96 $\pm$ 0.21)                 | 14              | 370<br>(-6.43 $\pm$ 0.10)                | 7.3             |
|         | FLP-21-COOH         | n.d.                                     | n.d.            | n.d.                                     | n.d.            |
|         | [F9tyramide]-FLP-21 | n.d.                                     | n.d.            | n.d.                                     | n.d.            |

**Table S3. Binding affinities of ligand variants at NPR-1 and NPR-11.**  $K_i$  values were obtained from displacement binding assays using a fixed concentration of 100 nM [TAMRA]-FLP-21/-FLP-34-1. -, not tested; n.d., binding not determinable up to 10  $\mu$ M peptide concentration. Data represent mean  $\pm$  SEM of  $n \geq 3$  independent experiments.

|         | receptor                        |                              |                                 |                            |      |  |
|---------|---------------------------------|------------------------------|---------------------------------|----------------------------|------|--|
|         | NPR-1                           |                              | NPR-11                          |                            |      |  |
|         | $K_i$ [nM]<br>log $K_i \pm$ SEM | x-fold of<br>wt FLP-21       | $K_i$ [nM]<br>log $K_i \pm$ SEM | x-fold of<br>wt FLP-21     |      |  |
| peptide | FLP-21                          | 4.7<br>(-8.33 $\pm$ 0.07)    | (1)                             | 79<br>(-7.10 $\pm$ 0.15)   | (1)  |  |
|         | [R5A]-FLP-21                    | 1730<br>(-5.76 $\pm$ 0.19)   | 368                             | 1020<br>(-5.99 $\pm$ 0.14) | 13   |  |
|         | [R5hArg]-FLP-21                 | 34<br>(-7.47 $\pm$ 0.03)     | 7.2                             | 310<br>(-6.51 $\pm$ 0.10)  | 3.9  |  |
|         | [L7A]-FLP-21                    | 753<br>(-6.12 $\pm$ 0.15)    | 160                             | 302<br>(-6.52 $\pm$ 0.34)  | 3.8  |  |
|         | [R8A]-FLP-21                    | 11600<br>(-4.94 $\pm$ 6.45)  | 2468                            | n.d.                       | n.d. |  |
|         | [R8Q]-FLP-21                    | 16600<br>(-4.78 $\pm$ 17.56) | 3532                            | n.d.                       | n.d. |  |
|         | [R8hArg]-FLP-21                 | 1040<br>(-5.98 $\pm$ 0.10)   | 221                             | 2370<br>(-5.63 $\pm$ 0.46) | 30   |  |
|         | [F9L]-FLP-21                    | 8280<br>(-5.08 $\pm$ 2.75)   | 1762                            | n.d.                       | n.d. |  |
|         | [F9Cha]-FLP-21                  | 906<br>(-6.04 $\pm$ 0.24)    | 193                             | 1210<br>(-5.92 $\pm$ 0.67) | 15   |  |
|         | [F9Y]-FLP-21                    | 51<br>(-7.29 $\pm$ 0.12)     | 11                              | 107<br>(-6.97 $\pm$ 0.46)  | 1.4  |  |
|         | FLP-21-COOH                     | 7760<br>(-5.11 $\pm$ 2.66)   | 1651                            | -                          | -    |  |
|         | [F9tyramide]-FLP-21             | 1370<br>(-5.86 $\pm$ 0.16)   | 291                             | 3650<br>(-5.44 $\pm$ 0.32) | 46   |  |
|         |                                 | <b>NPR-11</b>                |                                 |                            |      |  |
|         |                                 | FLP-34-1                     | 107<br>(-6.97 $\pm$ 0.11)       | (1)                        |      |  |
|         |                                 | [R15A]-FLP-34-1              | 10600<br>(-4.97 $\pm$ 2.04)     | 99                         |      |  |
|         |                                 | [R15hArg]-FLP-34-1           | 334<br>(-6.48 $\pm$ 0.10)       | 3.1                        |      |  |
|         |                                 | [L16A]-FLP-34-1              | 2890<br>(-5.54 $\pm$ 0.67)      | 27                         |      |  |
|         | [L16Q]-FLP-34-1                 | 1710<br>(-5.78 $\pm$ 0.41)   | 16                              |                            |      |  |
|         | [R17A]-FLP-34-1                 | 18000<br>(-4.74 $\pm$ 5.48)  | 168                             |                            |      |  |
|         | [R17hArg]-FLP-34-1              | 1180<br>(-5.93 $\pm$ 0.17)   | 11                              |                            |      |  |

**Table S4. Identification of direct interacting partners between NPR-1 (receptor) and FLP-21 (ligand), measured by double-cycle mutagenesis in cAMP reporter gene assay ( $G_{1/0}$ ).**  $EC_{50}$  values as well as  $EC_{50}$  shifts are given. The first column of  $EC_{50}$  shifts shows the relative shift of the corresponding mutant (mut) compared to the wild type (wt) receptor stimulated with wt FLP-21. The second column then normalizes the  $EC_{50}$  shift of the respective receptor variant to wt FLP-21, i.e., is set to 1. All other -fold- $EC_{50}$  shifts relate to this column. Reduced  $EC_{50}$  shifts of a peptide at a particular receptor variant compared to the shift at the wild type receptor (top row) indicate a direct interaction. All variants tested were full agonists with  $E_{max}$  values within the statistical error of the wild type receptor-peptide pairing. -, not tested; n.d., activation not determinable up to 10  $\mu$ M peptide concentration. Data represent mean  $\pm$  SEM of  $n \geq 3$  independent experiments.

|               |                                 | peptide                                 |                                     |                             |                                         |                             |                                         |                             |                                         |                             |                                         |                             |                                         |                             |                                         |                             |                                         |                             |
|---------------|---------------------------------|-----------------------------------------|-------------------------------------|-----------------------------|-----------------------------------------|-----------------------------|-----------------------------------------|-----------------------------|-----------------------------------------|-----------------------------|-----------------------------------------|-----------------------------|-----------------------------------------|-----------------------------|-----------------------------------------|-----------------------------|-----------------------------------------|-----------------------------|
|               |                                 | FLP-21                                  |                                     |                             | [R5A]-FLP-21                            |                             | [R5hArg]-FLP-21                         |                             | [P6G]-FLP-21                            |                             | [L7A]-FLP-21                            |                             | [R8hArg]-FLP-21                         |                             | [F9Cha]-FLP-21                          |                             | [F9Y]-FLP-21                            |                             |
|               |                                 | $EC_{50}$ [nM]<br>log $EC_{50} \pm$ SEM | x-fold<br>of wt<br>NPR-1<br>/FLP-21 | x-fold of<br>mut<br>/FLP-21 | $EC_{50}$ [nM]<br>log $EC_{50} \pm$ SEM | x-fold of<br>mut<br>/FLP-21 | $EC_{50}$ [nM]<br>log $EC_{50} \pm$ SEM | x-fold of<br>mut<br>/FLP-21 | $EC_{50}$ [nM]<br>log $EC_{50} \pm$ SEM | x-fold of<br>mut<br>/FLP-21 | $EC_{50}$ [nM]<br>log $EC_{50} \pm$ SEM | x-fold of<br>mut<br>/FLP-21 | $EC_{50}$ [nM]<br>log $EC_{50} \pm$ SEM | x-fold of<br>mut<br>/FLP-21 | $EC_{50}$ [nM]<br>log $EC_{50} \pm$ SEM | x-fold of<br>mut<br>/FLP-21 | $EC_{50}$ [nM]<br>log $EC_{50} \pm$ SEM | x-fold of<br>mut<br>/FLP-21 |
| receptor      | <b>NPR-1 wt</b>                 | 0.8<br>(-9.10 $\pm$ 0.05)               | (1)                                 | (1)                         | 290<br>(-6.54 $\pm$ 0.15)               | 367                         | 5.2<br>(-8.28 $\pm$ 0.13)               | 6.6                         | 464<br>(-6.33 $\pm$ 0.18)               | 580                         | 393<br>(-6.41 $\pm$ 0.15)               | 497                         | 771<br>(-6.11 $\pm$ 0.17)               | 976                         | 478<br>(-6.32 $\pm$ 0.20)               | 605                         | 11<br>(-7.96 $\pm$ 0.21)                | 14                          |
|               | <b>T2.61A</b>                   | 139<br>(-6.86 $\pm$ 0.11)               | 174                                 | (1)                         | -                                       | -                           | -                                       | -                           | -                                       | -                           | n.d.                                    | n.d.                        | -                                       | -                           | -                                       | -                           | 1493<br>(-5.83 $\pm$ 0.41)              | 11                          |
|               | <b>T2.61S</b>                   | 26<br>(-7.59 $\pm$ 0.13)                | 33                                  | (1)                         | -                                       | -                           | -                                       | -                           | n.d.                                    | n.d.                        | 2199<br>(-5.66 $\pm$ 0.25)              | 84                          | -                                       | -                           | 1964<br>(-5.71 $\pm$ 0.16)              | 76                          | -                                       | -                           |
|               | <b>Q3.32H</b>                   | 37<br>(-7.43 $\pm$ 0.11)                | 46                                  | (1)                         | -                                       | -                           | -                                       | -                           | -                                       | -                           | n.d.                                    | n.d.                        | -                                       | -                           | -                                       | -                           | 451<br>(-6.35 $\pm$ 0.47)               | 17                          |
|               | <b>Y4.60A</b>                   | 5<br>(-8.30 $\pm$ 0.11)                 | 6.3                                 | (1)                         | -                                       | -                           | -                                       | -                           | -                                       | -                           | -                                       | -                           | -                                       | -                           | -                                       | -                           | 57<br>(-7.24 $\pm$ 0.16)                | 11                          |
|               | <b>E5.27D</b>                   | 495<br>(-6.31 $\pm$ 0.10)               | 627                                 | (1)                         | n.d.                                    | n.d.                        | 1809<br>(-5.74 $\pm$ 0.15)              | 3.7                         | -                                       | -                           | -                                       | -                           | 16600<br>(-4.78 $\pm$ 0.35)             | 34                          | -                                       | -                           | -                                       | -                           |
|               | <b>E6.59A</b>                   | 20<br>(-7.70 $\pm$ 0.11)                | 25                                  | (1)                         | 4.8<br>(-8.32 $\pm$ 0.11)               | 0.24                        | 9.4<br>(-8.03 $\pm$ 0.11)               | 0.5                         | -                                       | -                           | -                                       | -                           | 1820<br>(-5.74 $\pm$ 0.22)              | 91                          | -                                       | -                           | -                                       | -                           |
|               | <b>E6.59D</b>                   | 0.1<br>(-9.88 $\pm$ 0.15)               | 0.13                                | (1)                         | -                                       | -                           | 0.6<br>(-9.26 $\pm$ 0.14)               | 6.0                         | -                                       | -                           | -                                       | -                           | 157<br>(-6.81 $\pm$ 0.14)               | 1570                        | -                                       | -                           | -                                       | -                           |
|               | <b>D6.61A</b>                   | 8.3<br>(-8.10 $\pm$ 0.08)               | 10                                  | (1)                         | 971<br>(-6.01 $\pm$ 0.18)               | 117                         | 49<br>(-7.31 $\pm$ 0.06)                | 5.9                         | -                                       | -                           | -                                       | -                           | -                                       | -                           | -                                       | -                           | -                                       | -                           |
|               | <b>D6.62A</b>                   | 2.8<br>(-8.55 $\pm$ 0.18)               | 3.5                                 | (1)                         | 1153<br>(-5.94 $\pm$ 0.35)              | 412                         | 16<br>(-7.81 $\pm$ 0.15)                | 5.7                         | -                                       | -                           | -                                       | -                           | 3810<br>(-5.42 $\pm$ 0.26)              | 1360                        | -                                       | -                           | -                                       | -                           |
|               | <b>E6.59A+</b><br><b>D6.61A</b> | 1469<br>(-5.83 $\pm$ 0.29)              | 1859                                | (1)                         | -                                       | -                           | 303<br>(-6.52 $\pm$ 0.23)               | 0.2                         | -                                       | -                           | -                                       | -                           | -                                       | -                           | -                                       | -                           | -                                       | -                           |
| <b>Y7.32A</b> | 19<br>(-7.72 $\pm$ 0.09)        | 24                                      | (1)                                 | -                           | -                                       | -                           | -                                       | n.d.                        | n.d.                                    | n.d.                        | n.d.                                    | -                           | -                                       | -                           | -                                       | -                           | 381<br>(-6.42 $\pm$ 0.18)               | 20                          |

**Table S5. Identification of direct interacting partners between NPR-11 (receptor) and FLP-21 (ligand), measured by double-cycle mutagenesis in cAMP reporter gene assay ( $G_{i/o}$ ).**  $EC_{50}$  values as well as  $EC_{50}$  shifts are given. The first column of  $EC_{50}$  shifts shows the relative shift of the corresponding mutant (mut) compared to the wild type (wt) receptor stimulated with wild type FLP-21. The second column then normalizes the  $EC_{50}$  shift of the respective receptor variant to wt FLP-21, i.e., is set to 1. All other -fold- $EC_{50}$  shifts relate to this column. Reduced  $EC_{50}$  shifts of a peptide at a particular receptor variant compared to the shift at the wild type receptor (top row) indicate a direct interaction. All variants tested were full agonists with  $E_{max}$  values within the statistical error of the wild type receptor-peptide pairing. -, not tested; n.d., activation not determinable up to 10  $\mu$ M peptide concentration. Data represent mean  $\pm$  SEM of  $n \geq 3$  independent experiments.

|               |                             | peptide                                 |                                      |                             |                                         |                             |                                         |                             |                                         |                             |                                         |                             |                                         |                             |   |
|---------------|-----------------------------|-----------------------------------------|--------------------------------------|-----------------------------|-----------------------------------------|-----------------------------|-----------------------------------------|-----------------------------|-----------------------------------------|-----------------------------|-----------------------------------------|-----------------------------|-----------------------------------------|-----------------------------|---|
|               |                             | FLP-21                                  |                                      | [R5A]-FLP-21                |                                         | [R5hArg]-FLP-21             |                                         | [L7A]-FLP-21                |                                         | [R8hArg]-FLP-21             |                                         | [F9Cha]-FLP-21              |                                         |                             |   |
|               |                             | $EC_{50}$ [nM]<br>log $EC_{50} \pm$ SEM | x-fold<br>of wt<br>NPR-11<br>/FLP-21 | x-fold of<br>mut<br>/FLP-21 | $EC_{50}$ [nM]<br>log $EC_{50} \pm$ SEM | x-fold of<br>mut<br>/FLP-21 | $EC_{50}$ [nM]<br>log $EC_{50} \pm$ SEM | x-fold of<br>mut<br>/FLP-21 | $EC_{50}$ [nM]<br>log $EC_{50} \pm$ SEM | x-fold of<br>mut<br>/FLP-21 | $EC_{50}$ [nM]<br>log $EC_{50} \pm$ SEM | x-fold of<br>mut<br>/FLP-21 | $EC_{50}$ [nM]<br>log $EC_{50} \pm$ SEM | x-fold of<br>mut<br>/FLP-21 |   |
| receptor      | <b>NPR-11 wt</b>            | 51<br>(-7.30 $\pm$ 0.05)                | (1)                                  | (1)                         | 925<br>(-6.03 $\pm$ 0.17)               | 18                          | 295<br>(-6.53 $\pm$ 0.10)               | 5.8                         | 478<br>(-6.32 $\pm$ 0.19)               | 9.4                         | 6868<br>(-5.16 $\pm$ 0.50)              | 135                         | 1078<br>(-5.97 $\pm$ 0.13)              | 21                          |   |
|               | <b>T2.61A</b>               | 203<br>(-6.69 $\pm$ 0.07)               | 4.0                                  | (1)                         | -                                       | -                           | -                                       | -                           | 1647<br>(-5.78 $\pm$ 0.13)              | 8.1                         | -                                       | -                           | -                                       | -                           |   |
|               | <b>M2.68N</b>               | 502<br>(-6.30 $\pm$ 0.14)               | 9.8                                  | (1)                         | -                                       | -                           | -                                       | -                           | 3315<br>(-5.48 $\pm$ 0.60)              | 6.6                         | -                                       | -                           | -                                       | -                           |   |
|               | <b>Q3.32A</b>               | 0.1<br>(-10.02 $\pm$ 0.06)              | 0.002                                | (1)                         | -                                       | -                           | -                                       | -                           | 30<br>(-7.53 $\pm$ 0.09)                | 300                         | -                                       | -                           | -                                       | -                           |   |
|               | <b>L4.51A</b>               | 315<br>(-6.50 $\pm$ 0.13)               | 6.2                                  | (1)                         | -                                       | -                           | -                                       | -                           | n.d.                                    | n.d.                        | -                                       | -                           | -                                       | -                           |   |
|               | <b>E5.23A</b>               | n.d.                                    | n.d.                                 | (1)                         | n.d.                                    | n.d.                        | -                                       | -                           | -                                       | -                           | -                                       | -                           | -                                       | -                           | - |
|               | <b>E5.23D</b>               | 3926<br>(-5.41 $\pm$ 0.24)              | 77                                   | (1)                         | -                                       | -                           | 12200<br>(-4.91 $\pm$ 0.20)             | 3.1                         | -                                       | -                           | 6030<br>(-5.22 $\pm$ 0.33)              | 1.5                         | -                                       | -                           |   |
|               | <b>E5.26D</b>               | 89<br>(-7.05 $\pm$ 0.06)                | 1.7                                  | (1)                         | -                                       | -                           | 226<br>(-6.65 $\pm$ 0.09)               | 2.5                         | -                                       | -                           | 2808<br>(-5.55 $\pm$ 0.16)              | 32                          | -                                       | -                           |   |
|               | <b>F7.35A</b>               | n.d.                                    | n.d.                                 | (1)                         | -                                       | -                           | -                                       | -                           | n.d.                                    | n.d.                        | -                                       | -                           | -                                       | -                           | - |
|               | <b>F7.35H</b>               | 15620<br>(-4.81 $\pm$ 0.19)             | 306                                  | (1)                         | -                                       | -                           | -                                       | -                           | -                                       | -                           | -                                       | -                           | n.d.                                    | n.d.                        |   |
| <b>F7.35L</b> | 12660<br>(-4.90 $\pm$ 0.61) | 248                                     | (1)                                  | -                           | -                                       | -                           | -                                       | -                           | -                                       | -                           | -                                       | n.d.                        | n.d.                                    |                             |   |

**Table S6. Activity of FLP-34-1 mutants in cAMP reporter gene assays ( $G_{i/o}$ ).  $EC_{50}$  shifts are given relative to the corresponding wild type receptor. All variants tested were full agonists with  $E_{max}$  values within the statistical error of the wild type receptor-peptide pairing. n.d., activation not determinable up to 10  $\mu$ M peptide concentration. Data represent mean  $\pm$  SEM of  $n \geq 3$  independent experiments.**

|                        |                           | receptor                   |              |
|------------------------|---------------------------|----------------------------|--------------|
|                        |                           | NPR-11                     |              |
|                        |                           | $EC_{50}$ [nM]             | x-fold of wt |
|                        |                           | $\log EC_{50} \pm SEM$     |              |
| peptide                | FLP-34-1                  | 1.1<br>(-8.96 $\pm$ 0.05)  | (1)          |
|                        | [TAMRA]-FLP-34-1          | 0.4<br>(-9.37 $\pm$ 0.12)  | 0.4          |
|                        | [S8K]-FLP-34-1            | 0.2<br>(-9.75 $\pm$ 0.06)  | 0.2          |
|                        | [G14A]-FLP-34-1           | 2.0<br>(-8.70 $\pm$ 0.16)  | 1.8          |
|                        | [G14E]-FLP-34-1           | 0.8<br>(-9.08 $\pm$ 0.14)  | 0.7          |
|                        | [R15A]-FLP-34-1           | 1006<br>(-6.00 $\pm$ 0.13) | 915          |
|                        | [R15hArg]-FLP-34-1        | 2.2<br>(-8.65 $\pm$ 0.08)  | 2            |
|                        | [L16A]-FLP-34-1           | 161<br>(-6.79 $\pm$ 0.15)  | 146          |
|                        | [L16Q]-FLP-34-1           | 147<br>(-6.83 $\pm$ 0.24)  | 134          |
|                        | [R17A]-FLP-34-1           | 1061<br>(-5.97 $\pm$ 0.39) | 965          |
|                        | [R17hArg]-FLP-34-1        | 85<br>(-7.07 $\pm$ 0.10)   | 77           |
|                        | [R15,17A]-FLP-34-1        | 4201<br>(-5.38 $\pm$ 0.61) | 3819         |
|                        | [Y18A]-FLP-34-1           | n.d.                       | n.d.         |
|                        | [Y18F]-FLP-34-1           | 1.3<br>(-8.88 $\pm$ 0.19)  | 1.2          |
| [cycK8-Cterm]-FLP-34-1 | 393<br>(-6.41 $\pm$ 0.12) | 357                        |              |

**Table S7. Activity of NPR-11 mutants in cAMP reporter gene assays ( $G_{i/o}$ ).  $EC_{50}$  shifts are given relative to the corresponding wild type receptor. All variants tested were full agonists with  $E_{max}$  values within the statistical error of the wild type receptor-peptide pairing. -, not tested; n.d., activation not determinable up to 10  $\mu$ M peptide concentration. Data represent mean  $\pm$  SEM of  $n \geq 3$  independent experiments.**

|          | peptide                                 |                             |                                         |                             |      |
|----------|-----------------------------------------|-----------------------------|-----------------------------------------|-----------------------------|------|
|          | FLP-21                                  |                             | FLP-34-1                                |                             |      |
|          | $EC_{50}$ [nM]<br>log $EC_{50} \pm$ SEM | x-fold<br>of wt             | $EC_{50}$ [nM]<br>log $EC_{50} \pm$ SEM | x-fold<br>of wt             |      |
| receptor | NPR-11 wt                               | 51<br>(-7.30 $\pm$ 0.05)    | (1)                                     | 1.1<br>(-8.96 $\pm$ 0.05)   | (1)  |
|          | Nluc-NPR-11                             | 27<br>(-7.57 $\pm$ 0.16)    | 0.5                                     | 3.1<br>(-8.50 $\pm$ 0.14)   | 2.8  |
|          | T2.61A                                  | 203<br>(-6.69 $\pm$ 0.07)   | 4.0                                     | 2.3<br>(-8.63 $\pm$ 0.08)   | 2.1  |
|          | T2.64A                                  | 90<br>(-7.05 $\pm$ 0.20)    | 1.8                                     | 2.0<br>(-8.70 $\pm$ 0.15)   | 1.8  |
|          | M2.68A                                  | 88<br>(-7.05 $\pm$ 0.07)    | 1.7                                     | 1.2<br>(-8.92 $\pm$ 0.11)   | 1.1  |
|          | M2.68N                                  | 502<br>(-6.30 $\pm$ 0.14)   | 9.8                                     | 2.7<br>(-8.57 $\pm$ 0.06)   | 2.5  |
|          | Q3.32A                                  | 0.1<br>(-10.02 $\pm$ 0.06)  | 0.002                                   | 0.05<br>(-10.30 $\pm$ 0.08) | 0.05 |
|          | Q3.32H                                  | 44<br>(-7.35 $\pm$ 0.14)    | 0.9                                     | 8.3<br>(-8.08 $\pm$ 0.15)   | 7.5  |
|          | L4.51A                                  | 315<br>(-6.50 $\pm$ 0.13)   | 6.2                                     | 84<br>(-7.08 $\pm$ 0.08)    | 76   |
|          | I5.20A                                  | 38<br>(-7.42 $\pm$ 0.10)    | 0.7                                     | 17<br>(-7.77 $\pm$ 0.10)    | 15   |
|          | E5.23A                                  | n.d.                        | n.d.                                    | 955<br>(-6.02 $\pm$ 0.18)   | 868  |
|          | E5.23Q                                  | n.d.                        | n.d.                                    | 1852<br>(-5.73 $\pm$ 0.40)  | 1684 |
|          | E5.23D                                  | 3926<br>(-5.41 $\pm$ 0.24)  | 77                                      | 101<br>(-7.00 $\pm$ 0.12)   | 92   |
|          | E5.26A                                  | n.d.                        | n.d.                                    | n.d.                        | n.d. |
|          | E5.26Q                                  | 17<br>(-7.21 $\pm$ 0.08)    | 0.3                                     | 1.1<br>(-8.95 $\pm$ 0.15)   | 1    |
|          | E5.26D                                  | 89<br>(-7.05 $\pm$ 0.06)    | 1.7                                     | 1.1<br>(-8.97 $\pm$ 0.07)   | 1    |
|          | E5.29A                                  | 94<br>(-7.03 $\pm$ 0.17)    | 1.8                                     | -                           | -    |
|          | T5.39A                                  | 498<br>(-6.30 $\pm$ 0.08)   | 9.8                                     | -                           | -    |
|          | Q5.46A                                  | 18<br>(-7.75 $\pm$ 0.09)    | 0.4                                     | 0.5<br>(-9.33 $\pm$ 0.13)   | 0.5  |
|          | W6.48A                                  | 96<br>(-7.02 $\pm$ 0.11)    | 1.9                                     | 4.9<br>(-8.31 $\pm$ 0.18)   | 4.5  |
|          | N6.58A                                  | 58<br>(-7.24 $\pm$ 0.06)    | 1.1                                     | 2.0<br>(-8.69 $\pm$ 0.21)   | 1.8  |
|          | T6.59A                                  | 17<br>(-7.76 $\pm$ 0.10)    | 0.3                                     | 0.2<br>(-9.69 $\pm$ 0.16)   | 0.2  |
|          | E6.61A                                  | 81<br>(-7.09 $\pm$ 0.15)    | 1.6                                     | 3.1<br>(-8.51 $\pm$ 0.17)   | 2.8  |
|          | F7.35A                                  | n.d.                        | n.d.                                    | 842<br>(-6.07 $\pm$ 0.15)   | 765  |
|          | F7.35H                                  | 15620<br>(-4.81 $\pm$ 0.19) | 306                                     | 58<br>(-7.24 $\pm$ 0.11)    | 53   |
|          | F7.35L                                  | 12660<br>(-4.90 $\pm$ 0.61) | 248                                     | 117<br>(-6.93 $\pm$ 0.06)   | 106  |



**Table S8. Identification of direct interacting partners between NPR-11 (receptor) and FLP-34-1 (ligand), measured by double-cycle mutagenesis in cAMP reporter gene assay ( $G_{i/o}$ ).**  $EC_{50}$  values as well as  $EC_{50}$  shifts are given. The first column of  $EC_{50}$  shifts shows the relative shift of the corresponding mutant (mut) compared to the wild type (wt) receptor stimulated with wild type FLP-21. The second column then normalizes the  $EC_{50}$  shift of the respective receptor variant to wt FLP-21, i.e., is set to 1. All other -fold- $EC_{50}$  shifts relate to this column. Reduced  $EC_{50}$  shifts of a peptide at a particular receptor variant compared to the shift at the wild type receptor (top row) indicate a direct interaction. All variants tested were full agonists with  $E_{max}$  values within the statistical error of the wild type receptor-peptide pair. -, not tested; n.d., activation not determinable up to 10  $\mu$ M peptide concentration. Data represent mean  $\pm$  SEM of  $n \geq 3$  independent experiments.

|          |                  | peptide                                 |                                        |                               |                                         |                               |                                         |                               |                                         |                               |                                         |                               |                                         |                               |                                         |                               |                                         |                               |
|----------|------------------|-----------------------------------------|----------------------------------------|-------------------------------|-----------------------------------------|-------------------------------|-----------------------------------------|-------------------------------|-----------------------------------------|-------------------------------|-----------------------------------------|-------------------------------|-----------------------------------------|-------------------------------|-----------------------------------------|-------------------------------|-----------------------------------------|-------------------------------|
|          |                  | FLP-34-1                                |                                        |                               | [R15A]-FLP-34-1                         |                               | [R15hArg]-FLP-34-1                      |                               | [L16A]-FLP-34-1                         |                               | [L16Q]-FLP-34-1                         |                               | [R17A]-FLP-34-1                         |                               | [R17hArg]-FLP-34-1                      |                               | [Y18F]-FLP-34-1                         |                               |
|          |                  | $EC_{50}$ [nM]<br>log $EC_{50} \pm$ SEM | x-fold<br>of wt<br>NPR-11<br>/FLP-34-1 | x-fold of<br>mut<br>/FLP-34-1 | $EC_{50}$ [nM]<br>log $EC_{50} \pm$ SEM | x-fold of<br>mut<br>/FLP-34-1 | $EC_{50}$ [nM]<br>log $EC_{50} \pm$ SEM | x-fold of<br>mut<br>/FLP-34-1 | $EC_{50}$ [nM]<br>log $EC_{50} \pm$ SEM | x-fold of<br>mut<br>/FLP-34-1 | $EC_{50}$ [nM]<br>log $EC_{50} \pm$ SEM | x-fold of<br>mut<br>/FLP-34-1 | $EC_{50}$ [nM]<br>log $EC_{50} \pm$ SEM | x-fold of<br>mut<br>/FLP-34-1 | $EC_{50}$ [nM]<br>log $EC_{50} \pm$ SEM | x-fold of<br>mut<br>/FLP-34-1 | $EC_{50}$ [nM]<br>log $EC_{50} \pm$ SEM | x-fold of<br>mut<br>/FLP-34-1 |
| receptor | <b>NPR-11 wt</b> | 1.1<br>(-8.96 $\pm$ 0.05)               | (1)                                    | (1)                           | 1006<br>(-6.00 $\pm$ 0.13)              | 915                           | 2.2<br>(-8.65 $\pm$ 0.08)               | 2                             | 161<br>(-6.79 $\pm$ 0.15)               | 146                           | 147<br>(-6.83 $\pm$ 0.24)               | 134                           | 1061<br>(-5.97 $\pm$ 0.39)              | 965                           | 85<br>(-7.07 $\pm$ 0.10)                | 77                            | 1.3<br>(-8.88 $\pm$ 0.19)               | 1.2                           |
|          | <b>T2.61A</b>    | 2.3<br>(-8.63 $\pm$ 0.08)               | 2.1                                    | (1)                           | -                                       | -                             | -                                       | -                             | 638<br>(-6.20 $\pm$ 0.25)               | 277                           | -                                       | -                             | -                                       | -                             | -                                       | -                             | -                                       | -                             |
|          | <b>M2.68N</b>    | 2.7<br>(-8.57 $\pm$ 0.06)               | 2.5                                    | (1)                           | -                                       | -                             | -                                       | -                             | 676<br>(-6.17 $\pm$ 0.20)               | 250                           | -                                       | -                             | -                                       | -                             | -                                       | -                             | -                                       | -                             |
|          | <b>Q3.32A</b>    | 0.05<br>(-10.30 $\pm$ 0.08)             | 0.05                                   | (1)                           | -                                       | -                             | -                                       | -                             | 6.6<br>(-8.18 $\pm$ 0.13)               | 132                           | 29<br>(-7.54 $\pm$ 0.36)                | 580                           | -                                       | -                             | -                                       | -                             | 0.07<br>(-10.15 $\pm$ 0.21)             | 1.4                           |
|          | <b>Q3.32H</b>    | 8.3<br>(-8.08 $\pm$ 0.15)               | 7.5                                    | (1)                           | -                                       | -                             | -                                       | -                             | 432<br>(-6.37 $\pm$ 0.17)               | 52                            | 1104<br>(-5.96 $\pm$ 0.17)              | 133                           | -                                       | -                             | -                                       | -                             | -                                       | -                             |
|          | <b>L4.51A</b>    | 84<br>(-7.08 $\pm$ 0.08)                | 76                                     | (1)                           | -                                       | -                             | -                                       | -                             | n.d.                                    | n.d.                          | -                                       | -                             | -                                       | -                             | -                                       | -                             | -                                       | -                             |
|          | <b>E5.23A</b>    | 955<br>(-6.02 $\pm$ 0.18)               | 868                                    | (1)                           | n.d.                                    | n.d.                          | -                                       | -                             | -                                       | -                             | -                                       | -                             | n.d.                                    | n.d.                          | -                                       | -                             | -                                       | -                             |
|          | <b>E5.23D</b>    | 101<br>(-7.00 $\pm$ 0.12)               | 92                                     | (1)                           | n.d.                                    | n.d.                          | 159<br>(-6.80 $\pm$ 0.07)               | 1.6                           | -                                       | -                             | -                                       | -                             | -                                       | -                             | 95<br>(-7.02 $\pm$ 0.07)                | 0.9                           | -                                       | -                             |
|          | <b>E5.26D</b>    | 1.1<br>(-8.97 $\pm$ 0.07)               | 1                                      | (1)                           | -                                       | -                             | 3.7<br>(-8.43 $\pm$ 0.07)               | 3.4                           | -                                       | -                             | -                                       | -                             | -                                       | -                             | 163<br>(-6.79 $\pm$ 0.10)               | 148                           | -                                       | -                             |
|          | <b>F7.35A</b>    | 842<br>(-6.07 $\pm$ 0.15)               | 765                                    | (1)                           | -                                       | -                             | -                                       | -                             | n.d.                                    | n.d.                          | -                                       | -                             | -                                       | -                             | -                                       | -                             | -                                       | -                             |

**Table S9. Alignment of NPR-1 and NPR-11 sequences to the structural templates used in Rosetta comparative modeling (RosettaCM).** Template alignments were obtained from GPCRdb [1], and NPR-1 and NPR-11 sequences were aligned to the template alignment using ClustalW [2]. The sequence alignment was further manually adjusted as previously described [3]. The N- and C-termini of the receptors as well as parts of the ICL3 were truncated because of lack of coordinates in the template structures: NPR-1, residues 1-7, 228-265, 362-458; NPR-11, residues 1-16, 248-259, 345-402 (truncation indicated by /). PSIPRED [4] and OCTOPUS [5] were used to predict transmembrane regions. **Bold**, conserved residue x.50 (BW numbering); **yellow**, cysteines forming a disulfide bridge; **green**, transmembrane region predicted by PSIPRED; **grey**, transmembrane region in structure; **red**,  $\beta$ -sheet in structure (for more information, see Method section)

|                          |       |                                     |                                         |                          |                                   |                                       |                      |
|--------------------------|-------|-------------------------------------|-----------------------------------------|--------------------------|-----------------------------------|---------------------------------------|----------------------|
|                          | 1     |                                     | <b>TM1</b>                              |                          | <b>ICL1</b>                       | 60                                    |                      |
| NPR-1_ <i>C.elegans</i>  | ----  | DCQVYWKVYPDPSQS                     | <b>YIAIVPFLTVYLELFFLGLFGNVTLIIYVTG</b>  |                          | SH-KALL-SVQ                       |                                       |                      |
| NPR-11_ <i>C.elegans</i> | /     | KINYFFRDDQVINGTEYSP                 | <b>KEFGYFITFAYMLIILFGAIGNFLTIIIVVIL</b> |                          | N-PAMR-TTR                        |                                       |                      |
| Y1R (5ZBQ)               | -     | FSEKNAQLLAFENDDCHLP                 | LAMIFTLALAYGAVIILGVSG                   | <b>NLALI</b>             | IIIIKQ-KEMR-NVT                   |                                       |                      |
| ET <sub>3</sub> R (5GLI) | ----- | ISPPPCQGP                           | IEIKETFKYINTVVSCLVFLVGI                 | <b>IGNSTLLY</b>          | IIIIYKN-KCMR-NGP                  |                                       |                      |
| K-OR-1 (4DJH)            | ----- | SPAIPV                              | IIITAVYSVVFVVG                          | <b>LVGNSLVMFVI</b>       | IRY-TKMK-TAT                      |                                       |                      |
|                          | 61    | <b>TM2</b>                          |                                         | <b>ECL1</b>              |                                   | <b>TM3</b>                            | 120                  |
| NPR-1_ <i>C.elegans</i>  |       | <b>NIFILNLAASDCMCMCILS</b>          | LPI                                     | <b>TPITNVY</b>           | -K-NWYF-                          | <b>GNNLCHLIPCIQGISIFVCTFSLG</b>       |                      |
| NPR-11_ <i>C.elegans</i> |       | <b>NFFILNLALSDFVFCIVTAPTTLTYVLY</b> |                                         | -M-FWP-                  |                                   | <b>SRTLCKIAGSLQGFNIFLSTFSIA</b>       |                      |
| Y1R (5ZBQ)               |       | NILIVNLSFSDLLVA                     | IMCLPFTFVY                              | TLM-D-HWVF-              | GEAM                              | <b>CKLNPFPVCVSITVSIWSLV</b>           |                      |
| ET <sub>3</sub> R (5GLI) |       | NILIASLALGDL                        | LHVIAIPINVKLLA                          | -E-DWPF-                 | GAEM                              | <b>CKLVPFIQKASVGITVLSLC</b>           |                      |
| K-OR-1 (4DJH)            |       | NIYIFNLALADALVT                     | -TTMPFQSTVYLM                           | -N-SWPF-                 | GDVL                              | <b>CKIVLSIDYINMFTSIFTLT</b>           |                      |
|                          | 121   |                                     | <b>ICL2</b>                             |                          |                                   | <b>TM4</b>                            | 180                  |
| NPR-1_ <i>C.elegans</i>  |       | <b>AIALDRYILVVR</b>                 | -PHS----                                | TPL-SQ                   | <b>RGAFLLTVLLWILSFVVTLPIYAFN</b>  | MQMIEY-TEE                            |                      |
| NPR-11_ <i>C.elegans</i> |       | <b>SIADVDRYVLIIF</b>                | -PTK----                                | RE-RQ                    | <b>LSFCFFIMIWVISLILAVPLLQASDL</b> | TPV-FVE                               |                      |
| Y1R (5ZBQ)               |       | LI                                  | AVRHHQLI                                | IN-PRG----               | WRP-NNRHAYVGI                     | AVI                                   | WVLA                 |
| ET <sub>3</sub> R (5GLI) |       | ALS                                 | IDRYRAVAS                               | -WSR----                 | IKG-VPKWTAVE                      | I                                     | VLIWVVS              |
| K-OR-1 (4DJH)            |       | MMSVDR                              | RYIAVCH                                 | -PVKA--                  | LDFR-                             | TPLKAKI                               | INICIWLLSSSVG        |
|                          | 181   |                                     | <b>ECL2</b>                             |                          |                                   | <b>TM5</b>                            | 240                  |
| NPR-1_ <i>C.elegans</i>  | ----- | RIC-GYF                             | CTE--                                   | KWE-----                 | S-                                | <b>AKSRRAYTMIVMLAQFVVPFAVMAFCYANI</b> |                      |
| NPR-11_ <i>C.elegans</i> | P---- | SCDLA-LYI                           | CHE--                                   | QNE--                    | IWEKM-                            | <b>IISKGTYTLAVLITQYAFPLFSLVFAYSRI</b> |                      |
| Y1R (5ZBQ)               | NVTL  | DAYKD-KY                            | <b>VC</b>                               | FPD                      | --QFP-----                        | S-                                    | DSHRLSYT             |
| ET <sub>3</sub> R (5GLI) | ----- | G                                   | <b>SY</b>                               | <b>LRI</b>               | <b>CLL</b>                        | --HPV--                               | QKTA                 |
| K-OR-1 (4DJH)            | ----- | VD-V                                | <b>IECSL</b>                            | --QFP----                | DDDY-                             | SWWDLFMKICVFIFAF                      | VIPVLI               |
|                          | 241   |                                     | <b>ICL3</b>                             |                          |                                   | <b>TM6</b>                            | 300                  |
| NPR-1_ <i>C.elegans</i>  |       | <b>VSVLSK</b>                       | - <b>RAQTKIR</b>                        | / <b>QRVV</b>            | - <b>LQNRRTSILVTM</b>             | <b>VVWFGITWLP</b>                     | <b>PHNVISLII</b>     |
| NPR-11_ <i>C.elegans</i> |       | <b>AHRMKL</b>                       | - <b>RFANRNQ</b>                        | / <b>RSVV</b>            | - <b>ERQR</b>                     | <b>RTHLLVCVAVFAV</b>                  | <b>AWLPLNVFHIFNT</b> |
| Y1R (5ZBQ)               |       | YIRLKR                              | -R-----                                 | -----                    | SETKR                             | INIMLLS                               | IVVAF                |
| ET <sub>3</sub> R (5GLI) |       | TC                                  | EMLR-KL-----                            | NDHL-                    | QQR                               | REVAKT                                | VFCLV                |
| K-OR-1 (4DJH)            |       | ILRLKS                              | -VRLLSGR--                              | EKD-                     | RNLRR                             | ITRLV                                 | VVVAVFVVCWT          |
|                          | 301   | <b>ECL3</b>                         |                                         | <b>TM7</b>               |                                   | <b>H8</b>                             | 354                  |
| NPR-1_ <i>C.elegans</i>  |       | <b>FR</b>                           | LYGRDDY-DI                              | <b>SYLLNLFTHSIAMSNNV</b> | <b>LNVPVLYAWL</b>                 | <b>PSFRQLVIKTY</b>                    | FGDR/                |
| NPR-11_ <i>C.elegans</i> | ----- | VN-S                                | <b>FSVTTF</b>                           | <b>SICHCLAMCSACLN</b>    | <b>PLIYAF</b>                     | <b>NHNFRIEFMHL</b>                    | DRVG/                |
| Y1R (5ZBQ)               | ----- | AT-                                 | CNHNLLFLL                               | CHLTAMISTCVN             | PIFYG                             | FLNKNF                                | QRDLQFF              |
| ET <sub>3</sub> R (5GLI) | P--   | NRCELL-                             | SFLLVLDY                                | IGINMASLNSCAN            | PIALYLV                           | SKRFKNA                               | FKSALCC---           |
| K-OR-1 (4DJH)            | ----- | SAALSS                              | YFYFCIALGY                              | TNSSLN                   | <b>PIIYAF</b>                     | <b>LDENFKRC</b>                       | FRDFCFP---           |

**Table S10. Affinity of TAMRA-labeled peptides (FLP-21 and FLP-34-1) to NPR-1 and NPR-11 variants in a nanoBRET binding assay.** The fluorophore is attached at the N terminus of the peptides, which still retains high potency (see Table S2 and S6). The peptide concentrations were varied over 7 orders of magnitude and affinities were obtained by a sigmoidal concentration-response fit with fixed Hill slope  $n_H = 1$ . \*, biphasic behavior with  $n_{H, 1,2} = 1$ . n.d., not detectable. Data represent mean  $\pm$  SEM of  $n \geq 3$  independent experiments.

|          |                  | peptide                                                                          |                                         |                                                |                                                |
|----------|------------------|----------------------------------------------------------------------------------|-----------------------------------------|------------------------------------------------|------------------------------------------------|
|          |                  | [TAMRA]-FLP-21                                                                   |                                         |                                                |                                                |
|          |                  | $K_D$ [nM]<br>$\log K_D \pm \text{SEM}$                                          | x-fold<br>of wt                         | $\text{BRET}_{\text{max}}$<br>$\pm \text{SEM}$ |                                                |
| receptor | NPR-1 wt         | 59<br>(-7.23 $\pm$ 0.08)                                                         | (1)                                     | 0.093 $\pm$<br>0.004                           |                                                |
|          | NPR-1<br>Q3.32H  | 1135<br>(-5.95 $\pm$ 0.12)                                                       | 19                                      | 0.10 $\pm$<br>0.011                            |                                                |
|          | NPR-11<br>wt*    | biphasic<br>$K_{D,1}$ : 15<br>(-7.82 $\pm$ 0.69)<br>$K_{D,2}$ > 5000<br>(> -5.3) | $K_{D,1}$<br>(1)*                       | 0.005 $\pm$<br>0.001<br>> 0.04                 |                                                |
|          | NPR-11<br>Q3.32H | biphasic n.d.<br>> 5000<br>(> -5.3)                                              | n.d.                                    | > 0.04                                         |                                                |
|          | NPR-11<br>Q3.32A | biphasic n.d.<br>190<br>(-6.72 $\pm$ 0.07)                                       | 13                                      | 0.15 $\pm$<br>0.005                            |                                                |
|          | [TAMRA]-FLP-34-1 |                                                                                  |                                         |                                                |                                                |
|          |                  |                                                                                  | $K_D$ [nM]<br>$\log K_D \pm \text{SEM}$ | x-fold<br>of wt                                | $\text{BRET}_{\text{max}}$<br>$\pm \text{SEM}$ |
|          | NPR-11<br>wt     | 388<br>(-6.41 $\pm$ 0.05)                                                        | (1)                                     | 0.29 $\pm$<br>0.009                            |                                                |
|          | NPR-11<br>Q3.32H | 1400<br>(-5.85 $\pm$ 0.05)                                                       | 3.6                                     | 0.29 $\pm$<br>0.014                            |                                                |
|          | NPR-11<br>Q3.32A | 49<br>(-7.31 $\pm$ 0.07)                                                         | 0.1                                     | 0.25 $\pm$<br>0.009                            |                                                |

**Table S11. Binding affinities of ligand variants at wild type and Q<sup>3.32</sup> mutants of NPR-1 and NPR-11.** K<sub>i</sub> values were obtained from displacement binding assays using a fixed concentration of 100 nM [TAMRA]-FLP-21/-34-1. Comparison of the K<sub>i</sub> values at different receptor variants enables identification of direct ligand-receptor contacts in the same way as using receptor activation data (double-cycle mutagenesis, cf. Figures 3-5 and Tables S4, S5, S8). Reduced K<sub>i</sub> shifts of a peptide at a particular receptor variant compared to the shift at the wt receptor (top row) indicate a direct interaction. Data represent mean ± SEM of n ≥ 3 independent experiments.

|          |                      | peptide                                        |                                  |                               |                                                |                               |                                                |                               |                                                |                               |
|----------|----------------------|------------------------------------------------|----------------------------------|-------------------------------|------------------------------------------------|-------------------------------|------------------------------------------------|-------------------------------|------------------------------------------------|-------------------------------|
|          |                      | FLP-21                                         |                                  |                               | [L7A]-FLP-21                                   |                               | [F9Cha]-FLP-21                                 |                               | [F9Y]-FLP-21                                   |                               |
|          |                      | K <sub>i</sub> [nM]<br>logK <sub>i</sub> ± SEM | x-fold of<br>NPR-1/<br>FLP-21    | x-fold of<br>mut/<br>FLP-21   | K <sub>i</sub> [nM]<br>logK <sub>i</sub> ± SEM | x-fold of<br>mut/<br>FLP-21   | K <sub>i</sub> [nM]<br>logK <sub>i</sub> ± SEM | x-fold of<br>mut/<br>FLP-21   | K <sub>i</sub> [nM]<br>logK <sub>i</sub> ± SEM | x-fold of<br>mut/<br>FLP-21   |
| receptor | <b>NPR-1 wt</b>      | 4.6<br>(-8.34 ± 0.06)                          | (1)                              | (1)                           | 915<br>(-6.04 ± 0.09)                          | 199                           | 976<br>(-6.01 ± 0.13)                          | 212                           | 49<br>(-7.31 ± 0.09)                           | 11                            |
|          | <b>NPR-1 Q3.32H</b>  | 133<br>(-6.88 ± 0.26)                          | 29                               | (1)                           | > 10,000<br>> -5                               | > 75                          | 1580<br>(-5.80 ± 0.31)                         | 12                            | 186<br>(-6.73 ± 0.19)                          | 1.4                           |
|          | <b>NPR-11 wt</b>     | 107<br>(-6.97 ± 0.21)                          | (1)                              | (1)                           | 417<br>(-6.38 ± 0.27)                          | 3.9                           | 1810<br>(-5.74 ± 0.60)                         | 17                            | 169<br>(-6.77 ± 0.37)                          | 1.6                           |
|          | <b>NPR-11 Q3.32H</b> | 157<br>(-6.80 ± 0.36)                          | 1.5                              | (1)                           | 521<br>(-6.28 ± 0.41)                          | 4.6                           | 452<br>(-6.34 ± 0.39)                          | 4                             | 78<br>(-7.11 ± 0.34)                           | 0.7                           |
|          | <b>NPR-11 Q3.32A</b> | 120<br>(-6.93 ± 0.14)                          | 1.1                              | (1)                           | > 10,000<br>> -5                               | > 83                          | 1736<br>(-5.76 ± 0.16)                         | 14                            | 176<br>(-6.75 ± 0.13)                          | 1.5                           |
|          |                      | FLP-34-1                                       |                                  |                               | [L16A]-FLP-34-1                                |                               | [L16Q]-FLP-34-1                                |                               |                                                |                               |
|          |                      | K <sub>i</sub> [nM]<br>logK <sub>i</sub> ± SEM | x-fold of<br>NPR-11/<br>FLP-34-1 | x-fold of<br>mut/<br>FLP-34-1 | K <sub>i</sub> [nM]<br>logK <sub>i</sub> ± SEM | x-fold of<br>mut/<br>FLP-34-1 | K <sub>i</sub> [nM]<br>logK <sub>i</sub> ± SEM | x-fold of<br>mut/<br>FLP-34-1 | K <sub>i</sub> [nM]<br>logK <sub>i</sub> ± SEM | x-fold of<br>mut/<br>FLP-34-1 |
|          | <b>NPR-11 wt</b>     | 142<br>(-6.84 ± 0.09)                          | (1)                              | (1)                           | > 10,000<br>> -5                               | > 70                          | > 10,000<br>> -5                               | > 70                          | > 10,000<br>> -5                               | > 70                          |
|          | <b>NPR-11 Q3.32H</b> | 345<br>(-6.46 ± 0.03)                          | 2.4                              | (1)                           | > 10,000<br>> -5                               | > 29                          | > 10,000<br>> -5                               | > 29                          | > 10,000<br>> -5                               | > 29                          |
|          | <b>NPR-11 Q3.32A</b> | 41<br>(-7.39 ± 0.01)                           | 0.3                              | (1)                           | > 10,000<br>> -5                               | > 244                         | > 10,000<br>> -5                               | > 244                         | > 10,000<br>> -5                               | > 244                         |

**Table S12. *C. elegans* strains used in this study.**

| Strain | Abbreviation used in main text      | Genotype                                                                    | Origin                  |
|--------|-------------------------------------|-----------------------------------------------------------------------------|-------------------------|
| N2     | wild type                           | <i>C. elegans</i> wild isolate                                              | [6]                     |
| CX4148 | <i>npr-1</i>                        | <i>npr-1(ky13) X</i>                                                        | [7]                     |
| APR576 | <i>Ex[npr-1]</i>                    | <i>npr-1 (ky13) X; aprEx229 [pnpr-1::npr-1::gfp, pmyo-3::mcherry, pBSK]</i> | [8]                     |
| APR657 | <i>Ex[E6.59A]</i>                   | <i>npr-1(ky13) X; aprEx248 [pSP154, pmyo-3::mCherry, pBSK]</i>              | Generated in this study |
| APR659 | <i>Ex[E6.59A + D6.61A]</i>          | <i>npr-1(ky13) X; aprEx250 [pSP155, pmyo-3::mCherry, pBSK]</i>              | Generated in this study |
| APR661 | <i>Ex[E6.59A + D6.61A + D6.62A]</i> | <i>npr-1(ky13) X; aprEx252 [pSP156, pmyo-3::mCherry, pBSK]</i>              | Generated in this study |

**Table S13. Sequence of primers used to generate constructs presented in the study.**

| Primer                | Sequence (5'- 3')                           |
|-----------------------|---------------------------------------------|
| Mlul_secNluc_for      | AAAACGCGTGCCACCATGAACTCCTTCTCCACAAGC        |
| Nluc_SGGGGS_rev       | ACTACCTCCACCGCCTGACGCCAGAATGCGTTCGCAC       |
| QC_NPR1-delINT-C9_for | CCACGCGTGCCACCATG CAAGTATATTGGAAAGTGTATCC   |
| QC_NPR1-delINT-C9_rev | TTCCAATATACTTGCATGGTGGCACGCGTGGATCC         |
| QC_NPR1_C9A_for       | GAAAATTTTACCGACGCTCAAGTATATTGGAAAGTG        |
| QC_NPR1-C9A_rev       | CAATATACTTGAGCGTCGGTAAAAATTTTCAAC           |
| QC_NPR-1-T2.61A_f     | CCAATCGCCCCAATCACAAATGTGTACAAAACTGGTAC      |
| QC_NPR-1-T2.61A_r     | GATTGGGGCGATTGGAAGCGATAATATGCACATCATGC      |
| QC_NPR-1-T2.61S_f     | CTTCCAATCAGTCCAATCACAAATGTGTACAAAACTGGTAC   |
| QC_NPR-1-T2.61S_r     | GATTGGACTGATTGGAAGCGATAATATGCACATCATGC      |
| QC_NPR-1-W2.70A_f     | CAAAAACGCCTACTTTGGAAATCTACTCTGCCATTTGATACC  |
| QC_NPR-1-W2.70A_r     | CCAAAGTAGGCGTTTTTGTACACATTTGTGATTGGAGTGATTG |
| QC_NPR-1_C3.25A_f     | ATCTACTCGCCCATTTGATACCATGCATTCAAGG          |
| QC_NPR-1_C3.25A_r     | AAATGGGCGAGTAGATTTCCAAAGTACCAGTTTTTG        |
| QC_NPR-1-Q3.32A_f     | ATGCATTGCCGGTATCAGCATTTTTCGTATGCACATTCAG    |
| QC_NPR-1-Q3.32A_r     | TGATACCGGCAATGCATGGTATCAAATGGCAGAGTAG       |
| QC_NPR-1-Q3.32L_f     | ATGCATTCTGGGTATCAGCATTTTTCGTATGCACATTCAG    |
| QC_NPR-1-Q3.32L_r     | TGATACCCAGAATGCATGGTATCAAATGGCAGAGTAG       |
| QC_NPR-1-Q3.32H_f     | ATGCATTCACGGTATCAGCATTTTTCGTATGCACATTCAG    |
| QC_NPR-1-Q3.32H_r     | TGATACCGTGAATGCATGGTATCAAATGGCAGAGTAG       |
| QC_NPR-1-M4.57A_f     | ATATGCAAGCCATTGAATACACAGAAGAGAGAATATGCGGC   |
| QC_NPR-1-M4.57A_r     | GTATTCAATGGCTTGCATATTGAACGCATAGGGTAGAGTTAC  |
| QC_NPR-1-Y4.60A_f     | GATTGAAGCCACAGAAGAGAGAATATGCGGCTACTTTTG     |
| QC_NPR-1-Y4.60A_r     | CTTCTGTGGCTTCAATCATTTGCATATTGAACGCATAGGG    |
| QC_NPR-1_C5.21A_f     | GAATAGCCGGCTACTTTTTGCACTGAAAAGTGGG          |
| QC_NPR-1_C5.21A_r     | GTAGCCGGCTATTCTCTTCTGTGTATTCAATC            |
| QC_NPR-1-F5.24A_f     | GCTACGCCTGCACTGAAAAGTGGGAATCTGCCAAG         |
| QC_NPR-1-F5.24A_r     | AGTGCAGGCGTAGCCGCATATTCTCTTCTGTGTATTC       |

|                                  |                                                |
|----------------------------------|------------------------------------------------|
| QC_NPR-1-F5.24L_f                | GGCTACCTCTGCACTGAAAAGTGGGAATCTGCCAAG           |
| QC_NPR-1-F5.24L_r                | CAGTGCAGAGGTAGCCGCATATTCTCTCTTCTGTGTATTC       |
| QC_NPR-1_C5.25A_f                | CTACTTTGCCACTGAAAAGTGGGAATCTGCCAAG             |
| QC_NPR-1_C5.25A_r                | TTCAGTGGCAAAGTAGCCGCATATTCTCTCTTCTG            |
| QC_NPR-1-E5.27A_f                | TTGCACTGCCAAGTGGGAATCTGCCAAGTCTAGAAGAG         |
| QC_NPR-1-E5.27A_r                | CCACTTGGCAGTGCAAAAAGTAGCCGCATATTCTCTCTTC       |
| QC_NPR-1-E5.27Q_f                | TTGCACTCAAAAAGTGGGAATCTGCCAAGTCTAGAAGAG        |
| QC_NPR-1-E5.27Q_r                | CCACTTTTGGAGTGCAAAAAGTAGCCGCATATTCTCTCTTC      |
| QC_NPR-1-E5.27D_f                | TTGCACTGACAAGTGGGAATCTGCCAAGTCTAGAAGAG         |
| QC_NPR-1-E5.27D_r                | CCACTTGTCAAGTGCAAAAAGTAGCCGCATATTCTCTCTTC      |
| QC_NPR1_E183(5.30)D_for          | CTGAAAAGTGGGACTCTGCCAAGTCTAGAAG                |
| QC_NPR1_E183(5.30)D_rev          | CTTGGCAGAGTCCCACCTTTTCAGTGC                    |
| QC_NPR1_T192(5.39)A_for          | GAAGAGCCTACGCAATGATCGTGATGCTCG                 |
| QC_NPR1_T192(5.39)A_rev          | CACGATCATTGCGTAGGCTCTTCTAGAC                   |
| QC_NPR-1-W6.48A_f                | ATAACTGCCCTGCCACATAACGTCATTTCTTTGATTATTGAATA   |
| QC_NPR-1-W6.48A_r                | GTGGCAGGGCAGTTATCCCAAACCAGACAACCATG            |
| QC_NPR-1-W6.48Y_f                | GATAACTTACCTGCCACATAACGTCATTTCTTTGATTATTGAATA  |
| QC_NPR-1-W6.48Y_r                | GTGGCAGGTAAGTTATCCCAAACCAGACAACCATG            |
| QC_NPR-1-W6.48H_f                | ATAACTCACCTGCCACATAACGTCATTTCTTTGATTATTGAATA   |
| QC_NPR-1-W6.48H_r                | GTGGCAGGTGAGTTATCCCAAACCAGACAACCATG            |
| QC_NPR-1-I6.58A_f                | CTTTGATTGCCGAATATGATGACACACAATCGTTTTTCCG       |
| QC_NPR-1-I6.58A_r                | CATATTCGGCAATCAAAGAAATGACGTTATGTGGCAGCC        |
| QC_NPR-1-E6.59A_f                | ATTGCCTATGATGACACACAATCGTTTTTCCGACTTTATGG      |
| QC_NPR-1-E6.59A_r                | TGTGTCATCATAGGCAATAATCAAAGAAATGACGTTATGTGG     |
| QC_NPR-1-E6.59D_f                | TTATTGACTATGATGACACACAATCGTTTTTCCGACTTTATGGC   |
| QC_NPR-1-E6.59D_r                | GTGTGTCATCATAGTCAATAATCAAAGAAATGACGTTATGTGGC   |
| QC_NPR-1-D6.61A_f                | TTGAATATGCCGACACACAATCGTTTTTCCGACTTTATGGC      |
| QC_NPR-1-D6.61A_r                | GTGTGTCGGCATATTCAATAATCAAAGAAATGACGTTATGTGG    |
| QC_NPR-1-E6.59A-D6.61A_f         | ATTGCCTATGCCGACACACAATCGTTTTTCCGACTTTATGG      |
| QC_NPR-1-E6.59A-D6.61A_r         | TGTGTGCGCATAGGCAATAATCAAAGAAATGACGTTATGTGG     |
| QC_NPR-1-D6.62A_f                | GAATATGATGCCACACAATCGTTTTTCCGACTTTATGGCAG      |
| QC_NPR-1-D6.62A_r                | ATTGTGTGGCATCATATTCAATAATCAAAGAAATGACGTTATGTGG |
| QC_NPR-1-E6.59A-D6.61A-D6.62A_f: | TGCCTATGCCGCGACACAATCGTTTTTCCGACTTTATGG        |
| QC_NPR-1-E6.59A-D6.61A-D6.62A_r: | GTCGCGGCATAGGCATAATCAAAGAAATGACGTTATGTGG       |
| QC_NPR-1-D7.26A_f                | GGCAGAGCCGATTACGATATCAGTATTTACTGAACCTTTTC      |
| QC_NPR-1-D7.26A_r                | GTAATCGGCTCTGCCATAAAGTCGGAAAAACGATTGTGTG       |
| QC_NPR-1-D7.27A_f                | CAGAGATGCCTACGATATCAGTATTTACTGAACCTTTTCACTC    |
| QC_NPR-1-D7.27A_r                | GATATCGTAGGCATCTCTGCCATAAAGTCGGAAAAACGATTG     |
| QC_NPR-1-Y7.28A_f                | AGATGATGCCGATATCAGTATTTACTGAACCTTTTCACTCAC     |
| QC_NPR-1-Y7.28A_r                | CTGATATCGGCATCATCTCTGCCATAAAGTCGGAAAAAC        |
| QC_NPR-1-Y7.32A_f                | GATATCAGTGCCTTACTGAACCTTTTCACTCACAGTATTGC      |
| QC_NPR-1-Y7.32A_r                | CAGTAAGGCACTGATATCGTAATCATCTCTGCCATAAAGTC      |
|                                  |                                                |
| QC_NPR11-delINT-D9_for           | CGTGCCACCATG AATTATGTAGAAATTTTCAACAAAATC       |
| QC_NPR11-delINT-D9_rev           | AATTTCTACATAATTCATGGTGGCACGCGTGGATCC           |
| QC_NPR11_C8A_for                 | CGGTGAATGAATCAGCTGACAATTATGTAGAAATTTTC         |

|                          |                                                   |
|--------------------------|---------------------------------------------------|
| QC_NPR11_C8A_rev         | CTACATAATTGTCAGCTGATTCATTACCGATCC                 |
| QC_NPR-11_T2.61A_f       | CCGACCGCCTTATACACGGTCTCTACATGTTCTGG               |
| QC_NPR-11_T2.61A_r       | GTATAAGGCGGTTCGGCGCTGTCACAATACAAACAAAAAAG         |
| QC_NPR-11_T2.64A_f       | CATTATACGCCGTTCTCTACATGTTCTGGCCATTTAGC            |
| QC_NPR-11_T2.64A_r       | GAGAACGGCGTATAATGTGGTCGGCGCTGTCAC                 |
| QC_NPR-11_M2.68A_f       | CTCTACGCCTTCTGGCCATTTAGCAGGACATTATGC              |
| QC_NPR-11_M2.68A_r       | CCAGAAGGCGTAGAGAACCGTGTATAATGTGGTCG               |
| QC_NPR-11_M2.68N_f       | CTCTACAACCTTCTGGCCATTTAGCAGGACATTATGC             |
| QC_NPR-11_M2.68N_r       | CCAGAAGTTGTAGAGAACCGTGTATAATGTGGTCG               |
| QC_NPR-11_W2.70A_f       | ATGTTTCGCCCCATTTAGCAGGACATTATGCAAATTGCG           |
| QC_NPR-11_W2.70A_r       | CTAAATGGGGCGAACATGTAGAGAACCGTGTATAATGTG           |
| QC_NPR-11_C3.25A_f       | GACATTAGCCAAAATTGCGGGTTCGCTGCAAGG                 |
| QC_NPR-11_C3.25A_r       | CAATTTTGGCTAATGTCCTGCTAAATGGCCAGAAC               |
| QC_NPR-11-Q3.32A_f       | TCGCTGGCCGGCTTTAACATATTTTTATCCACATTCTCG           |
| QC_NPR-11-Q3.32A_r       | GCCGGCCAGCGAACCCGCAATTTTGCATAATGTC                |
| QC_NPR-11-Q3.32H_f       | TCGCTGCACGGCTTTAACATATTTTTATCCACATTCTCG           |
| QC_NPR-11-Q3.32H_r       | GCCGTGCAGCGAACCCGCAATTTTGCATAATGTC                |
| QC_NPR-11_L4.51A_f       | TTCCAGCCCTGCAGGCTTCTGATTTGACACCGG                 |
| QC_NPR-11_L4.51A_r       | CTGCAGGGCTGGAACCGCAAGGATTAGGGAAATC                |
| QC_NPR-11_C5.14A_f       | CATCGGCCGATTTGGCTCTTTACATTTGCCATG                 |
| QC_NPR-11_C5.14A_r       | CAAATCGGCCGATGGCTCAACGAAAACCGG                    |
| QC_NPR-11_I5.20A_f       | CTTTACGCCTGCCATGAGCAAAATGAGATATGGGAAAAG           |
| QC_NPR-11_I5.20A_r       | CATGGCAGGCGTAAAGAGCCAAATCGCACGATGG                |
| QC_NPR-11_C5.21A_f       | TTACATTGCCCATGAGCAAAATGAGATATGGGAAAAG             |
| QC_NPR-11_C5.21A_r       | CTCATGGGCAATGTAAAGAGCCAAATCGCACGAT                |
| QC_NPR-11-E5.23A_f       | TGCCATGCCCAAAATGAGATATGGGAAAAGATGATCATATC         |
| QC_NPR-11-E5.23A_r       | TCATTTTGGGCATGGCAAATGTAAAGAGCCAAATCGCAC           |
| QC_NPR-11_E5.23Q_f       | TTTGCCATCAACAAAATGAGATATGGGAAAAGATGATCATATCAAAAG  |
| QC_NPR-11_E5.23Q_r       | CTCATTTTGTGATGGCAAATGTAAAGAGCCAAATCGCACG          |
| QC_NPR-11_E5.23D_f       | TTTGCCATGACCAAAATGAGATATGGGAAAAGATGATCATATCAAAAGG |
| QC_NPR-11_E5.23D_r       | CTCATTTTGGTCATGGCAAATGTAAAGAGCCAAATCGCACG         |
| QC_NPR-11_E5.26Q_f       | GAGCAAAATCAAATATGGGAAAAGATGATCATATCAAAAGGCAC      |
| QC_NPR-11_E5.26Q_r       | CCCATATTTGATTTTGCTCATGGCAAATGTAAAGAGCCAAATC       |
| QC_NPR-11_E5.26D_f       | GAGCAAAATGACATATGGGAAAAGATGATCATATCAAAAGGCAC      |
| QC_NPR-11_E5.26D_r       | CCCATATGTCATTTTGCTCATGGCAAATGTAAAGAGCCAAATC       |
| QC_NPR11_E199(5.26)A_for | CATTTGCCATGCTCAAAATGAGATATGGGAAA                  |
| QC_NPR11_E199(5.26)A_rev | CATATCTCATTTTGGAGCATGGCAAATGTAAAGAG               |
| QC_NPR11_E202(5.29)A_for | CATGAGCAAAATGCTATATGGGAAAAGATGATC                 |
| QC_NPR11_E202(5.29)A_rev | TTTCCCATATAGCATTTTGGCTCATGGCAAATGTAAAG            |
| QC_NPR11_T212(5.39)A_for | CAAAAGGCACCTACGCGTTGGCAGTTCTTATC                  |
| QC_NPR11_T212(5.39)A_rev | GAAGTCCCAACGCGTAGGTGCCTTTTGGATATG                 |
| QC_NPR-11_Q5.46A_f       | ATCACCGCCTACGCATTTCCCTGTTTTCACTAGTC               |
| QC_NPR-11_Q5.46A_r       | TGCGTAGGCGGTGATAAGAAGTCCCAACGTGTAGG               |
| QC_NPR-11-W6.48A_f       | TCGCCGCCCTGCCACTCAACGTTTTTTCATATCTTC              |
| QC_NPR-11-W6.48A_r       | GCAGGGCGGCGACGGCGAATACAGCTACAAC                   |
| QC_NPR-11_N6.58A_f       | TATCTTCGCCACATTCGAGCTGGTCAACAGTTTTTCC             |
| QC_NPR-11_N6.58A_r       | CGAATGTGGCGAAGATATGAAAACGTTGAGTGGCAG              |

|                                |                                             |
|--------------------------------|---------------------------------------------|
| QC_NPR-11_T6.59A_f             | CTTCAACGCCTTCGAGCTGGTCAACAGTTTTTCCGTTAC     |
| QC_NPR-11_T6.59A_r             | CTCGAAGGCGTTGAAGATATGAAAAACGTTGAGTGGCAG     |
| QC_NPR-11-E6.61A_f:            | ATTCGCCCTGGTCAACAGTTTTTCCGTTACAACGTTACAG    |
| QC_NPR-11-E6.61A_r:            | GTTGACCAGGGCGAATGTGTTGAAGATATGAAAAACGTTG    |
| QC_NPR-11_F7.35A_f             | ACAACGGCCAGCATCTGTCACTGCTTGGAATGTG          |
| QC_NPR-11_F7.35A_r             | GATGCTGGCCGTTGTAACGGAAAAACTGTTGACCAG        |
| QC_NPR-11_F7.35L_f             | TTACAACGCTCAGCATCTGTCACTGCTTGGAATGTG        |
| QC_NPR-11_F7.35L_r             | GATGCTGAGCGTTGTAACGGAAAAACTGTTGACCAGC       |
| QC_NPR-11_F7.35H_f             | TTACAACGCACAGCATCTGTCACTGCTTGGAATGTG        |
| QC_NPR-11_F7.35H_r             | GATGCTGTGCGTTGTAACGGAAAAACTGTTGACCAGC       |
|                                |                                             |
| QC.npr-1-E6.59A_f              | ATTGCCTATGATGACACACAATCGTTTTTCCGACTTTATGG   |
| QC.npr-1-E6.59A_r              | TGTGTCATCATAGGCAATAATCAAAGAAATGACGTTATGTGG  |
| QC.npr-1_E6.59A-D6.61A_r       | ATTGCCTATGCCGACACACAATCGTTTTTCCGACTTTATGG   |
| QC.npr-1_E6.59A-D6.61A_f       | TGTGTCGGCATAGGCAATAATCAAAGAAATGACGTTATGTGG  |
| QC.npr-1-E6.59-D6.61A-D6.62A_f | ATTGCCTATGCCGCGACACAATCGTTTTTCCGACTTTATGG   |
| QC.npr-1-E6.59-D6.61A-D6.62A_r | TGTGTCGGCATAGGCAATAATCAAAGAAATGACGTTATGTGG  |
| SGGGGS_NPR-1_for               | TCAGGCGGTGGAGGTAGTATGGAAAGTTGAAAATTTTACCGAC |
| SGGGGS_NPR-11_for              | TCAGGCGGTGGAGGTAGTATGGGATCGGTGAATGAATC      |
| YFP-XbaI-NheI-r                | TTTGCTAGCGTGTACCCTCTAGACCTG                 |



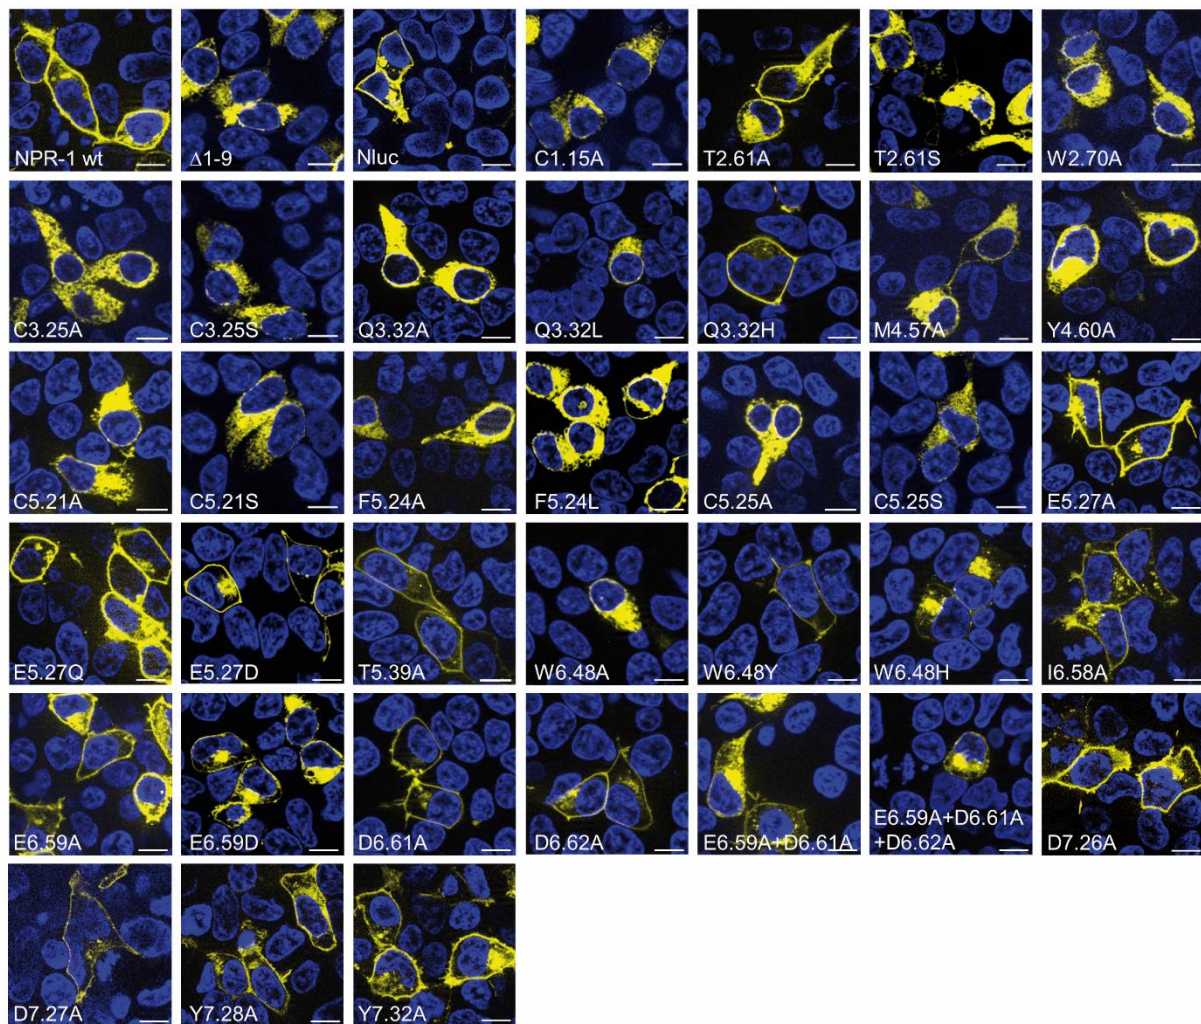

**Figure S1. Live cell fluorescence microscopy of *C. elegans* NPR-1 mutants.** The receptor variants are genetically fused C-terminally to eYFP (yellow) and transiently transfected into HEK293 cells, nuclei were stained with Hoechst33342 (blue). Several mutants are not correctly folded and exported to the plasma membrane and were not further assessed in functional assays:  $\Delta$ 1-9, C1.15A, W2.70A, C3.25A, C3.25S, Q3.32A, Q3.32L, M4.57A, Y4.60A, C5.21A, C5.21S, F5.24A, F5.24L, C5.25A, C5.25S, W6.48A. Scale bar: 10  $\mu$ m. Images are representative of three independent experiments.

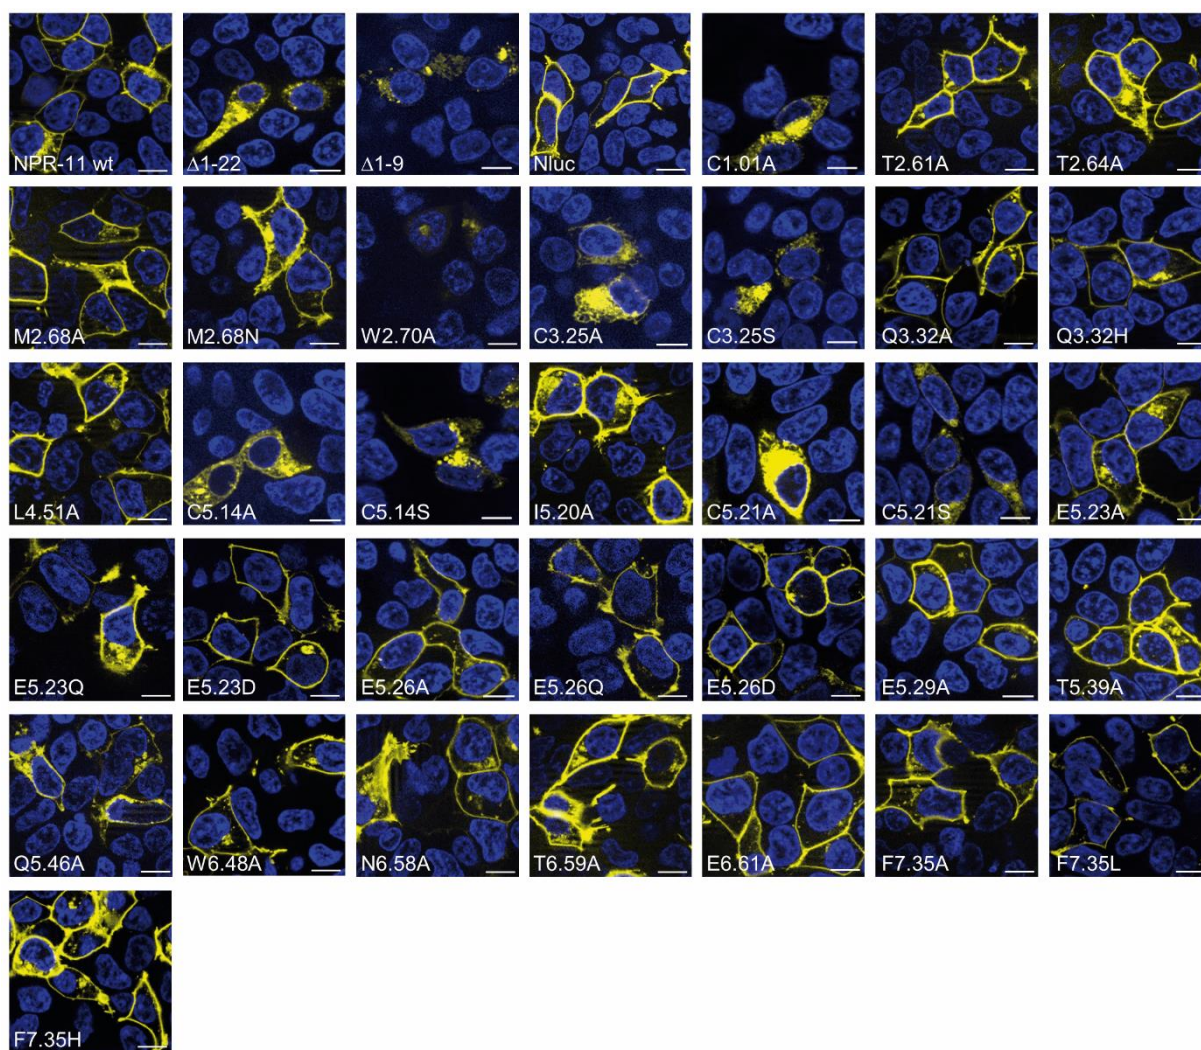

**Figure S2. Live cell fluorescence microscopy of *C. elegans* NPR-11 mutants.** The receptor variants are genetically fused C-terminally to eYFP (yellow) and transiently transfected into HEK293 cells, nuclei were stained with Hoechst33342 (blue). Several mutants are not correctly folded and exported to the plasma membrane and were not further assessed in functional assays:  $\Delta$ 1-22,  $\Delta$ 1-9, C1.01A, W2.70A, C3.25A, C3.25S, C5.14A, C5.14S, C5.21A, C5.21S. Scale bar: 10  $\mu$ m. Images are representative of three independent experiments.



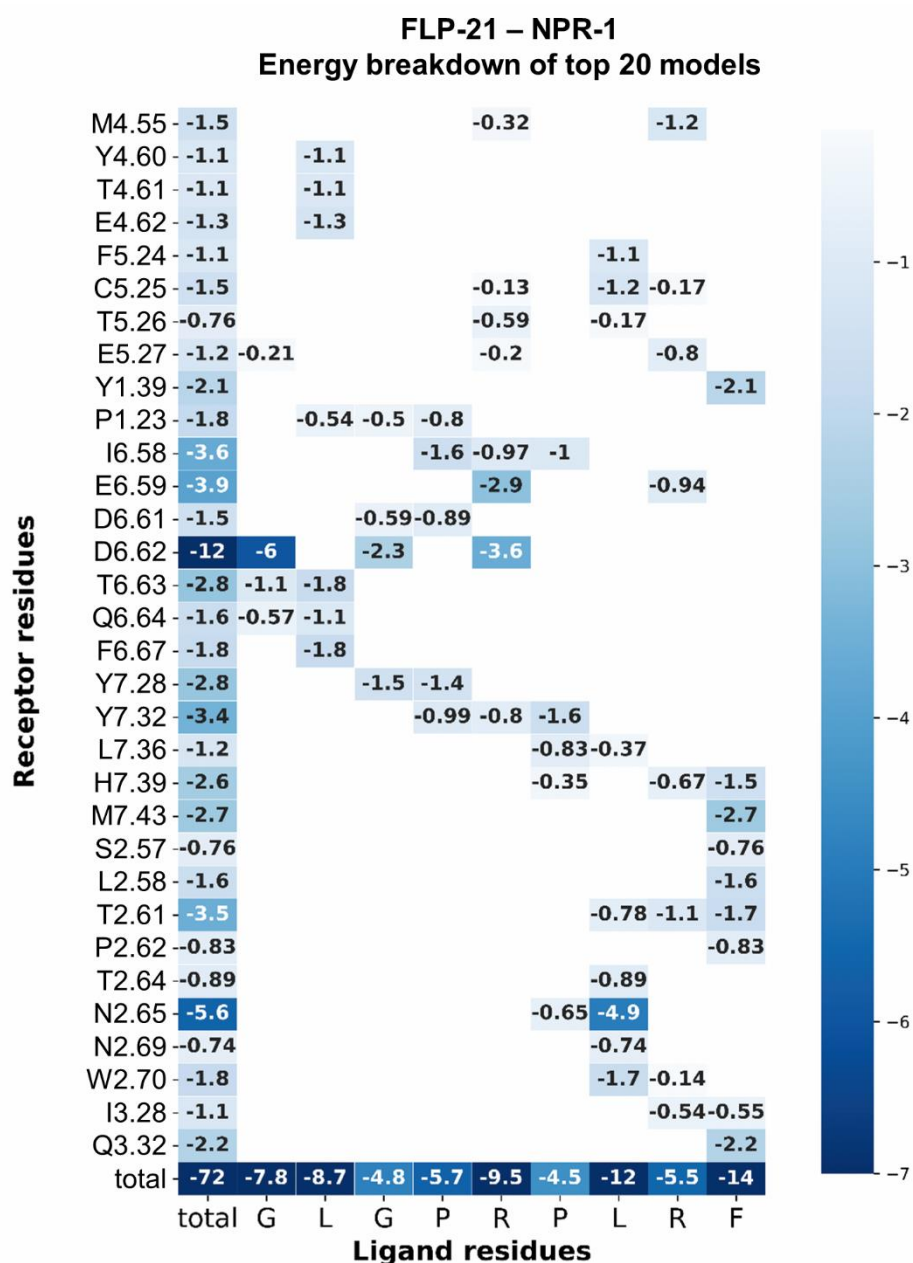

**Figure S3. Quantitative analysis of the per-residue energy for the top 20 models of FLP-21 docked into NPR-1.** The energetic analysis reflects the contribution of receptor and ligand positions to the binding energy and matches well with the functional data obtained by mutagenesis of the receptor and the ligand. The interface energy is averaged from all models exceeding an interaction energy threshold of 0.1 for this residue. Only receptor residues with an averaged energetic contribution of > 0.5 Rosetta Energy Units (REU) are shown.

**FLP-21 – NPR-11**  
**Energy breakdown of top 20 models**

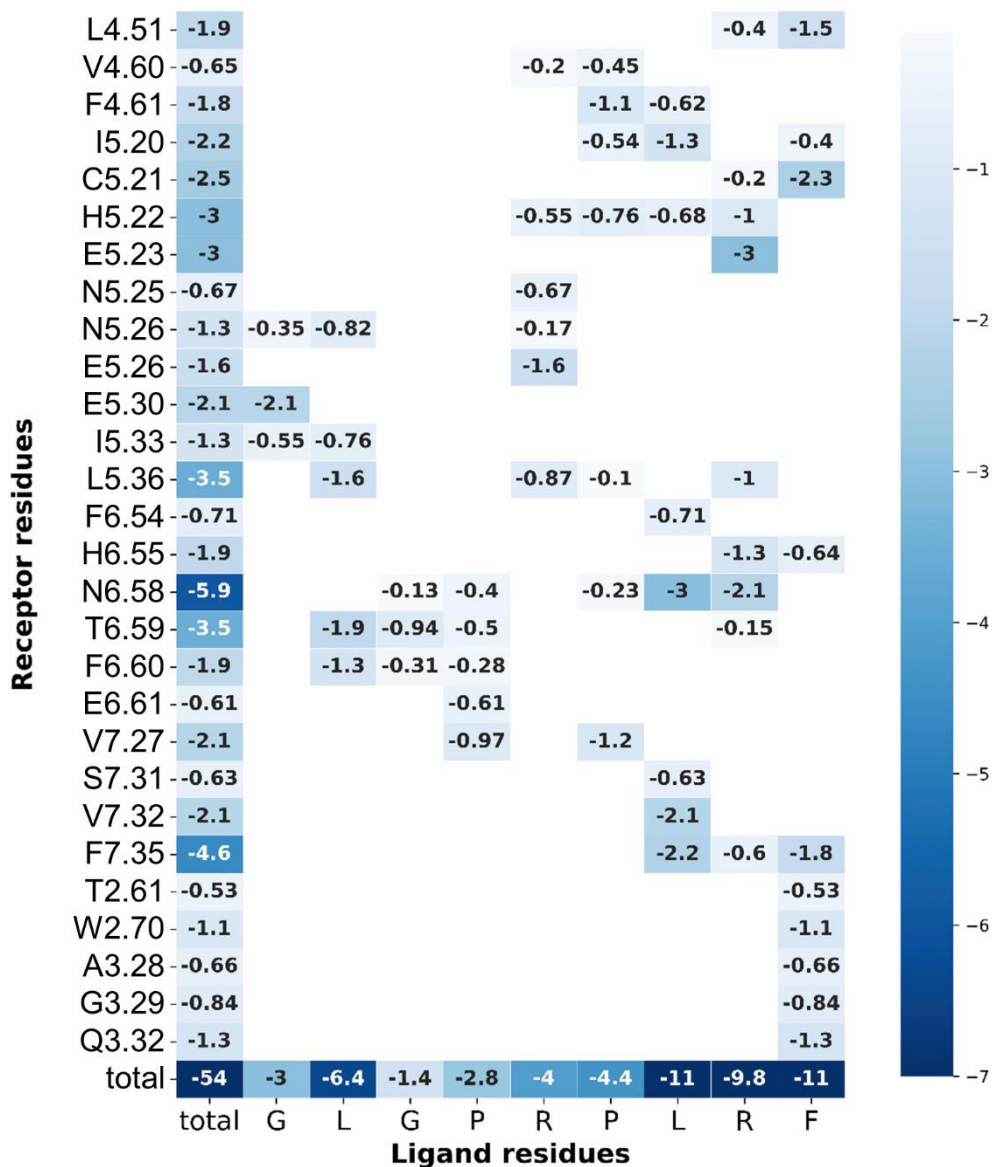

**Figure S4. Quantitative analysis of the per-residue energy for the top 20 models of FLP-21 docked into NPR-11.** The energetic analysis reflects the contribution of receptor and ligand positions to the binding energy and matches well with the functional data obtained by mutagenesis of the receptor and the ligand. The interface energy is averaged from all models exceeding an interaction energy threshold of 0.1 for this residue. Only receptor residues with an averaged energetic contribution of > 0.5 Rosetta Energy Units (REU) are shown.

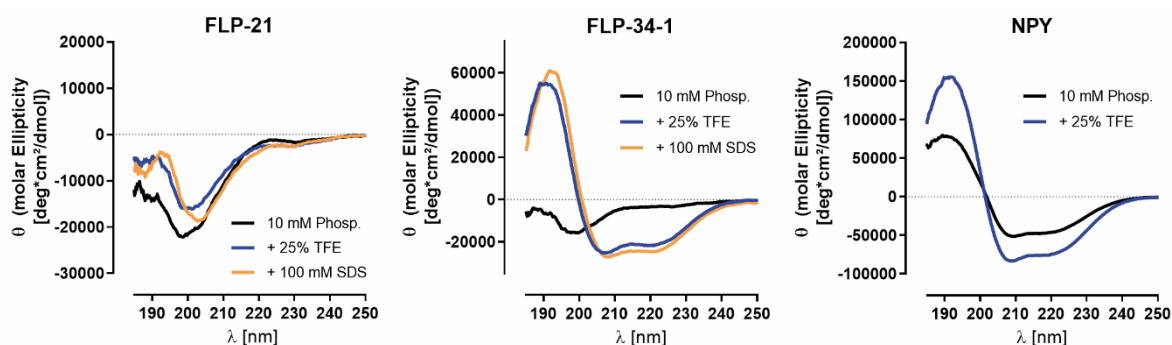

**Figure S5. CD spectroscopic analysis of ligands shows that an  $\alpha$ -helical shape can be induced in the FLP-34-1 ligand but not in FLP-21.** Ligands FLP-21 (left), FLP-34-1 (middle) and NPY (right) were analyzed with CD spectroscopy at a concentration of 25  $\mu$ M in 10 mM phosphate buffer (pH 7.0) +/- additions to assess their secondary structure. FLP-21 (left) forms a random coil. FLP-34-1 (middle) is a random coil in pure buffer solution, but an  $\alpha$ -helical structure with the characteristic minimum at 208 and 222 nm can be induced by addition of 25% trifluoroethanol (TFE) or 100 mM sodium dodecyl sulfate (SDS) as a membrane mimetic. NPY (control, right) forms an  $\alpha$ -helix in aqueous solution, which is reinforced by addition of 25% TFE. Data is representative of two independent experiments.

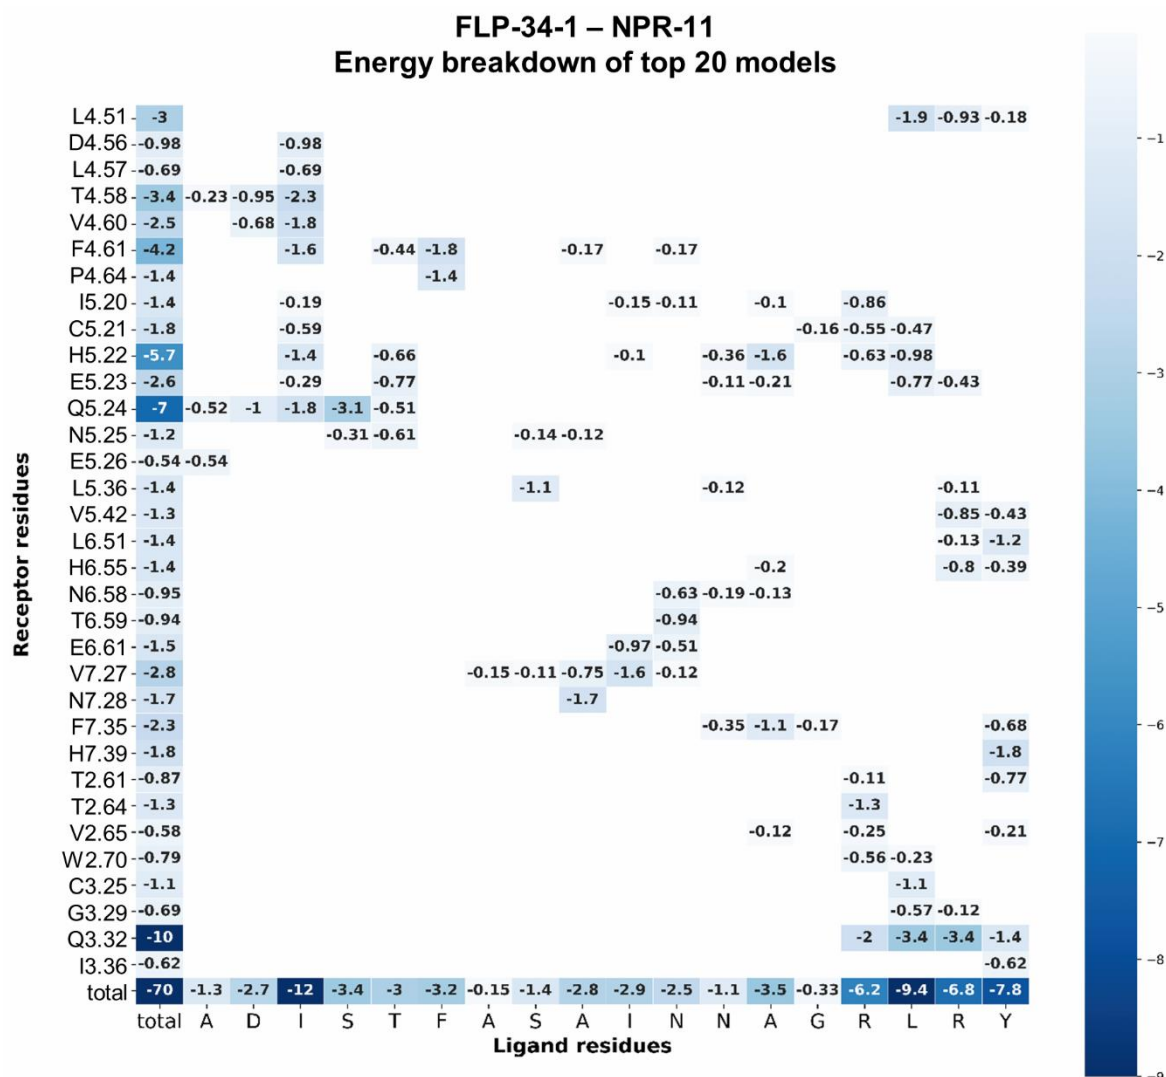

**Figure S6. Quantitative analysis of the per-residue energy for the top 20 models of FLP-34-1 docked into NPR-11.** The energetic analysis reflects the contribution of receptor and ligand positions to the binding energy and matches well with the functional data obtained by mutagenesis of the receptor and the ligand. The interface energy is averaged from all models exceeding an interaction energy threshold of 0.1 for this residue. Only receptor residues with an averaged energetic contribution of > 0.5 Rosetta Energy Units (REU) are shown.

## Supplementary References

- [1] C. Munk, V. Isberg, S. Mordalski, K. Harpsøe, K. Rataj, A.S. Hauser, P. Kolb, A.J. Bojarski, G. Vriend, D.E. Gloriam, GPCRdb: the G protein-coupled receptor database - an introduction, *Br. J. Pharmacol.* 173 (2016) 2195–2207. <https://doi.org/10.1111/bph.13509>.
- [2] M.A. Larkin, G. Blackshields, N.P. Brown, R. Chenna, P.A. McGettigan, H. McWilliam, F. Valentin, I.M. Wallace, A. Wilm, R. Lopez, J.D. Thompson, T.J. Gibson, D.G. Higgins, Clustal W and Clustal X version 2.0, *Bioinformatics.* 23 (2007) 2947–2948. <https://doi.org/10.1093/bioinformatics/btm404>.
- [3] B.J. Bender, B. Marlow, J. Meiler, Improving homology modeling from low-sequence identity templates in Rosetta: A case study in GPCRs, *PLOS Comput. Biol.* 16 (2020) e1007597. <https://doi.org/10.1371/journal.pcbi.1007597>.
- [4] D.T. Jones, Protein secondary structure prediction based on position-specific scoring matrices, *J. Mol. Biol.* 292 (1999) 195–202. <https://doi.org/10.1006/jmbi.1999.3091>.
- [5] H. Viklund, A. Elofsson, OCTOPUS: improving topology prediction by two-track ANN-based preference scores and an extended topological grammar, *Bioinformatics.* 24 (2008) 1662–1668. <https://doi.org/10.1093/bioinformatics/btn221>.
- [6] S. Brenner, The Genetics of *Caenorhabditis Elegans*, *Genetics.* 77 (1974) 71–94.
- [7] M. de Bono, C.I. Bargmann, Natural Variation in a Neuropeptide Y Receptor Homolog Modifies Social Behavior and Food Response in *C. elegans*, *Cell.* 94 (1998) 679–689. [https://doi.org/10.1016/S0092-8674\(00\)81609-8](https://doi.org/10.1016/S0092-8674(00)81609-8).
- [8] M.M. Gershkovich, V.E. Groß, A. Kaiser, S. Prömel, Pharmacological and functional similarities of the human neuropeptide Y system in *C. elegans* challenges phylogenetic views on the FLP/NPR system, *Cell Commun. Signal.* 17 (2019) 123. <https://doi.org/10.1186/s12964-019-0436-1>.
